# Supplementary material for: Real World Lab Data: Patterns of Lymphocyte Counts in Fingolimod Treated Patients
Source: PubMed Central journal article supplement (PMC6256977; doi:10.3389/fimmu.2018.02669), 2018-11-20
Supplement: Table_1.pdf [file Table_1.pdf]

Suppl. Table 1. Baseline characteristics

|                                                           |            |
|-----------------------------------------------------------|------------|
| <b>Age (yr ± SD)</b>                                      | 39.5 (9.9) |
| <b>Duration since MS diagnosis (yr ± SD)</b>              | 6.7 (5.9)  |
| <b>Sex (f/m)</b>                                          | 65/48      |
| <b>Previous DMT use before fingolimod start (no. (%))</b> | 91 (80.5)  |
| <b>Interferon beta</b>                                    | 45 (39.8)  |
| <b>Glatirameracetat</b>                                   | 27 (23.9)  |
| <b>Natalizumab</b>                                        | 14 (12.4)  |
| <b>Others</b>                                             | 5 (4.4)    |
| <b>None previous DMT use (no. (%))</b>                    | 22 (19.5)  |
| <b>BMI (± SD)</b>                                         | 25.0 (4.7) |
| <b>EDSS (± SD)</b>                                        | 2.8 (1.4)  |

Baseline characteristics of evaluated patients are depicted. DMT, disease modifying treatment. Other previous treatments included: Azathioprin (2), Laquinimod (3). During a standardized treatment switch procedure, injectables were stopped 2 weeks before fingolimod start, natalizumab was stopped 12 weeks before fingolimod start and other DMTs at least 6 months before fingolimod start. Yr, year; SD, standard deviation; f, female; m, male; no, number.
